# Supplementary material
Source: MDPI journal article supplement (https://www.mdpi.com/1996-1073/8/7/7407)
Supplement: s1 [file s1]

## Sheet: Table_S1
;KE_Mon;KE_Tue;KE_Wed;KE_Thu;KE_Fri;KE_Sat;KE_Sun;MO_Mon;MO_Tue;MO_Wed;MO_Thu;MO_Fri;MO_Sat;MO_Sun;WM_Mon;WM_Tue;WM_Wed;WM_Thu;WM_Fri;WM_Sat;WM_Sun;TD_Mon;TD_Tue;TD_Wed;TD_Thu;TD_Fri;TD_Sat;TD_Sun;DW_Mon;DW_Tue;DW_Wed;DW_Thu;DW_Fri;DW_Sat;DW_Sun
0;0;0;0;0;0;0;0;0;0;0;0;0;0;0;0;0;0;0;0;0;0;0;0;0	019607843;0;0;0;0	019607843;0;0;0;0;0;0;0
1;0;0;0;0;0;0;0;0;0;0;0;0;0;0;0;0;0;0;0;0;0;0;0;0	019607843;0;0;0;0;0;0;0;0;0;0;0
2;0;0;0;0;0;0;0;0;0;0;0;0;0;0;0;0;0;0;0;0;0	015384615;0;0;0;0;0;0;0;0;0;0;0;0;0;0
3;0;0;0;0;0;0;0;0;0;0	00862069;0;0;0;0;0;0;0;0;0;0;0;0;0;0	019607843;0;0;0;0;0;0;0;0;0;0;0
4;0;0;0;0;0;0;0;0;0;0	00862069;0;0;0;0;0;0;0;0;0;0;0;0;0;0	019607843;0;0;0;0;0;0;0;0;0;0;0
5;0	002840909;0	011363636;0	011363636;0	008522727;0;0;0;0;0	017241379;0	00862069;0	00862069;0;0;0;0;0;0	015384615;0;0;0;0;0;0;0;0;0;0;0;0;0;0;0;0;0;0
6;0	019886364;0	03125;0	008522727;0	03125;0	025568182;0;0	002840909;0	034482759;0	025862069;0	025862069;0	043103448;0	025862069;0;0;0;0;0;0	015384615;0;0;0;0;0;0;0;0;0;0;0;0;0;0;0	075757576;0;0
7;0	011363636;0;0;0	014204545;0	017045455;0	019886364;0	014204545;0	017241379;0;0	00862069;0	00862069;0;0	00862069;0	034482759;0;0	015384615;0	015384615;0	015384615;0	015384615;0;0;0;0;0	019607843;0;0;0;0;0;0;0	015151515;0;0	015151515;0	015151515;0	15151515
8;0	017045455;0	005681818;0	008522727;0	005681818;0	005681818;0	019886364;0	025568182;0	025862069;0;0;0	00862069;0;0	025862069;0	017241379;0;0	015384615;0	015384615;0	015384615;0;0;0;0;0;0	019607843;0;0;0;0;0;0;0;0;0	015151515;0	060606061;0	15151515
9;0	011363636;0	008522727;0	002840909;0;0	008522727;0	008522727;0	028409091;0	025862069;0	00862069;0;0	00862069;0	00862069;0;0	00862069;0;0;0	015384615;0	030769231;0;0;0;0;0	019607843;0;0	019607843;0;0;0	039215686;0	015151515;0;0	015151515;0;0;0	015151515;0	3030303
10;0	014204545;0	014204545;0;0	005681818;0	008522727;0	014204545;0	002840909;0;0	017241379;0	00862069;0	00862069;0;0	00862069;0;0;0	015384615;0	030769231;0	030769231;0;0;0;0;0;0;0	019607843;0;0;0	039215686;0	015151515;0	03030303;0;0;0	015151515;0	03030303;0	15151515
11;0	011363636;0	008522727;0	002840909;0	002840909;0	002840909;0	011363636;0	008522727;0	00862069;0;0;0;0;0;0;0;0	015384615;0	015384615;0;0	015384615;0	015384615;0	015384615;0;0;0	019607843;0	019607843;0;0;0;0;0;0;0	015151515;0	015151515;0;0	15151515
12;0;0;0	005681818;0;0	011363636;0	011363636;0	019886364;0;0;0;0;0;0;0	017241379;0;0;0	015384615;0;0;0	015384615;0	015384615;0;0;0	019607843;0	039215686;0;0;0;0;0	03030303;0;0	015151515;0	03030303;0;0
13;0	002840909;0;0;0;0;0	014204545;0	03125;0;0;0	00862069;0;0;0	00862069;0	017241379;0;0;0	015384615;0	015384615;0;0	015384615;0;0;0;0	019607843;0;0;0	019607843;0;0	015151515;0;0;0;0;0;0	45454545
14;0;0	002840909;0	002840909;0;0	014204545;0	002840909;0	008522727;0;0;0;0;0;0;0	017241379;0;0;0;0;0;0	046153846;0	015384615;0;0;0;0;0;0	019607843;0	019607843;0;0;0	015151515;0;0	015151515;0;0	60606061
15;0;0;0	002840909;0;0	008522727;0	008522727;0	017045455;0;0;0;0;0;0	017241379;0	00862069;0;0;0;0;0	015384615;0	030769231;0	030769231;0;0;0	039215686;0;0;0	058823529;0	019607843;0;0;0;0;0	015151515;0	015151515;0	3030303
16;0	008522727;0	002840909;0	005681818;0;0;0	011363636;0	005681818;0	00862069;0;0;0;0;0	00862069;0;0;0;0;0;0;0	015384615;0	015384615;0;0;0;0;0;0	019607843;0	039215686;0;0;0;0;0	015151515;0;0	15151515
17;0	008522727;0	011363636;0	017045455;0	011363636;0;0	002840909;0	005681818;0	00862069;0	025862069;0;0	00862069;0	00862069;0	034482759;0	017241379;0;0;0;0	015384615;0;0;0	030769231;0;0;0	019607843;0;0;0	019607843;0;0	015151515;0;0;0;0	015151515;0	015151515;0
18;0;0	017045455;0	014204545;0	008522727;0	011363636;0	017045455;0	014204545;0;0;0;0;0	00862069;0	00862069;0	017241379;0;0;0;0	015384615;0	015384615;0	015384615;0	015384615;0;0;0	019607843;0;0;0;0;0;0;0	015151515;0;0	015151515;0;0
19;0	011363636;0	014204545;0	008522727;0	025568182;0	002840909;0	005681818;0	017045455;0	025862069;0;0	00862069;0	017241379;0;0;0	068965517;0;0;0	015384615;0;0;0	046153846;0	015384615;0;0;0;0	039215686;0;0	019607843;0	019607843;0	015151515;0;0	015151515;0;0;0;0
20;0	002840909;0	005681818;0	005681818;0	008522727;0	005681818;0	005681818;0	017045455;0	017241379;0;0	00862069;0	00862069;0;0;0	060344828;0;0;0	015384615;0;0;0	061538462;0;0;0;0;0;0;0	039215686;0	039215686;0;0;0	015151515;0	015151515;0	015151515;0	015151515;0
21;0;0;0;0	008522727;0	008522727;0	002840909;0	002840909;0;0;0;0;0;0	043103448;0	017241379;0;0;0;0;0	015384615;0	046153846;0;0;0;0	019607843;0	019607843;0;0	039215686;0	019607843;0	015151515;0;0;0	015151515;0;0;0	15151515
22;0;0;0	002840909;0;0;0	005681818;0;0;0;0;0;0;0;0;0;0;0	015384615;0;0	015384615;0	030769231;0;0;0;0	019607843;0;0;0	019607843;0	019607843;0;0;0;0;0;0	015151515;0
23;0;0;0;0;0;0;0;0;0;0;0;0;0;0;0;0;0;0;0;0;0;0;0;0;0;0;0;0;0;0;0;0;0;0;0
